# Supplementary material
Source: MDPI journal article supplement (https://www.mdpi.com/1996-1073/13/6/1300)
Supplement: s1 [file s1]

## Supplementary Material:

# Valorization of wheat byproducts for the co-production of packaging material and enzymes

Pedro F Souza Filho <sup>1,2</sup>, Akram Zamani <sup>1</sup> and Jorge A Ferreira <sup>1</sup>

<sup>1</sup> Swedish Centre for Resource Recovery, University of Borås, 50190 Borås, Sweden; pfsfilho@gmail.com (P.F.S.F.); akram.zamani@hb.se (A.Z.)

<sup>2</sup> Laboratory of Biochemical Engineering, Chemical Engineering Department, Federal University of Rio Grande do Norte, 59078-970 Natal, Brazil

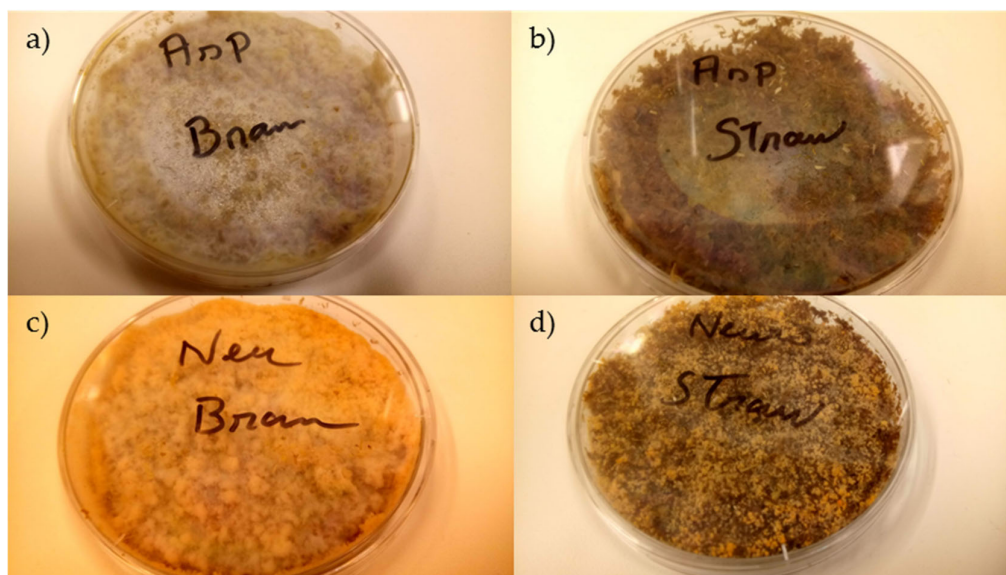

**Figure S1.** Wheat bran (a and c) and straw (b and d) cultivated with *Aspergillus oryzae* (a and b) and *Neurospora intermedia* (c and d).

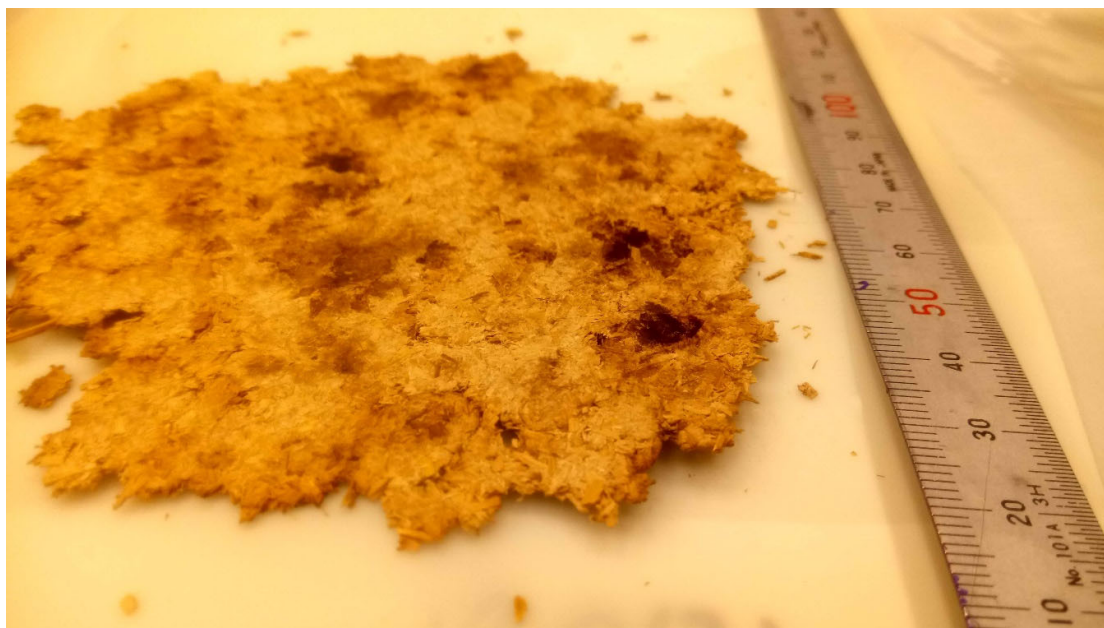

**Figure S2.** Alkali-pretreated wheat straw after fermentation by *Aspergillus oryzae* and pressing.

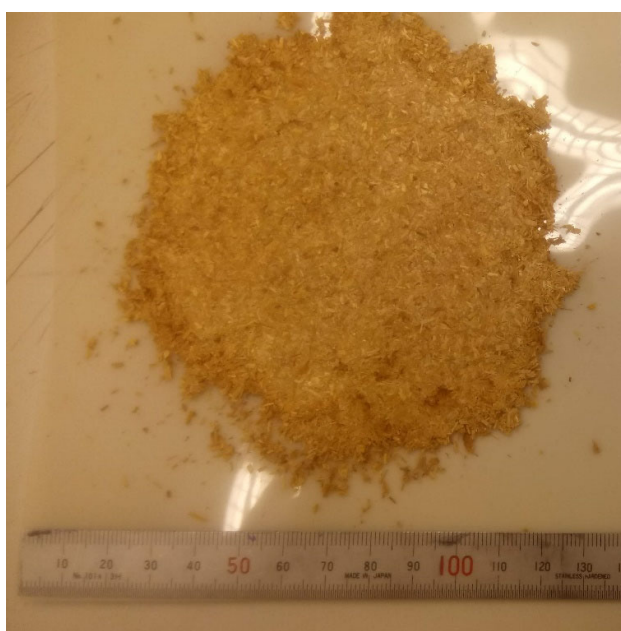

**Figure S3.** Wheat straw after fermentation by *Aspergillus oryzae* and pressing.

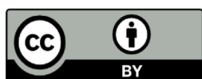

© 2020 by the authors. Submitted for possible open access publication under the terms and conditions of the Creative Commons Attribution (CC BY) license (<http://creativecommons.org/licenses/by/4.0/>).
